# Supplementary material for: Uncertainty and non-stationarity of empirical streamflow sensitivities
Source: Copernicus journal article supplement (doi:10.5194/egusphere-2025-4527), 2025-10-17
Supplement: Supplementary file [file egusphere-2025-4527-AC1-supplement.pdf]

**Comments in black**  
**Replies in blue**

**Referee #1**

**SYNTHESIS**

This paper deals with the precipitation and potential evaporation sensitivity of streamflow. It presents a theoretical study on the impact of different uncertainty sources which is very original, and allows to discard definitively one of the classical methods to identify elasticity (never seen anywhere in the literature... would be worth a technical note in itself). Then the paper goes on to show that the ongoing climatic change has already changed the empirical precipitation elasticity of streamflow in Germany, a very interesting and original result in itself.

We thank the reviewer for the detailed assessment and the helpful comments.

**OVERALL COMMENT**

This is a very good paper: excellent substance, excellent analysis, excellent form.

I would like in particular to congratulate the authors for using the sensitivities / absolute elasticities which are easily and logically interpretable (and have easily identifiable physical limits) instead of the relative ones ('true' elasticities). The plots showing the dependency of the relative elasticities (derived from the Turc-Mezentsev formula) to aridity, published elsewhere in the literature may be mathematically right but is useless in hydrological terms (the behavior with aridity makes no sense: we, as hydrologists, are not interested to know that a theoretical ratio of two terms that tend towards zero has a mathematical limit, we are interested to know that the two terms tend towards zero).

As a reviewer, my only recommendation is "don't change a word and publish as it is".

Thank you!

But since I am not only a reviewer but also a hydrologist interested in the topic, I could not help to comment your paper below. Feel free to consider or not my suggestions. I realize that there is enough matter to publish several very interesting papers, and I am definitely not requesting you to turn this paper into a very long undigestible paper.

Honestly, my only regret is your title, which is a little vague and not at the level of your work. The fact is that there are several very interesting points in your paper, it may be difficult to choose one over the others. Also, I guess that a strict statistician would argue that the term non-stationarity is not well-chosen, and would prefer you to talk about changing behavior, I remember a discussion with Prof. Koutsoyannis 10 years ago on this topic (see e.g. Efstratiadis et al., 2015).

Thank you for bringing this up. We will replace the word non-stationarity with temporal variability. Regarding the rest of the title, we have so far not found a better alternative without making it overly long, but we will think about it again when revising our manuscript.

## DETAILED COMMENTS

The introduction is excellent

Thank you!

Fig1: why did you choose to plot  $1-Q/P$  and not  $Q/P$ ? Also, I have a problem with your physical limits: when you use catchment data the water limit should correspond to  $Q=P$  and the energy limit to  $Q=P-EP$ . Your water limit only corresponds to the “physical limit” ( $Q=0$ ). I agree that it will be strange to have a “water limit” at 0, this is why I would personally use prefer to plot  $Q/P$  and not  $1-Q/P$ . See e.g. Fig. 1 in the paper by Andréassian et al. (2025).

This is a good point and we will change the figure in our revised manuscript.

Table 1: please adjust your notations ( $PET \rightarrow E_P$ ) for homogeneity with the rest of the paper

Thanks for spotting this, we will fix that.

Table 1: I understand what you mean by “same as  $Q = s_P P + s_{PET} PET + c$ ” even if I do not completely agree: when expressed in deltas, the formula offers other opportunities, such as the pooled regression which you mention, and is interesting to reduce the uncertainties and yield hydrologically coherent values

What we meant is that for the present case, it practically makes no difference. Since the  $c$  parameter “incorporates” the means, the fitted sensitivities are exactly the same (we also tested this to make sure). We will clarify that and change the phrasing.

Table 1: I do not understand why you introduced eq #1... a very (too?) simplistic choice, unless you want to show us that when the elasticity coefficients try to adjust to represent at the same time the intercept of the regression and the slope, strange things happen (do you really need to add this option in this paper?)

We added “Multiple Regression #1” because it leads to the “best” sensitivity estimates in the present case. We did not originally expect that and we agree that setting the intercept to 0 is a strong assumption. But since it leads to the lowest error (Table 3) and to the most realistic range of sensitivity values for potential evaporation (Figure 4b), we decided to keep it. In addition, we think that its link to the complementary relationship is interesting as it also highlights the strong assumptions inherent in that relationship (namely that the elasticities have to sum up to 1). We are happy to emphasize again that this is by no means a perfect choice, but it would feel a bit odd to completely omit it.

l130: does it make sense to assume positive correlation between delta  $Q$  et delta  $E$ ? 0 and negative could be enough? Unless there are places with that type of correlation in Australia perhaps.

As can be seen from Figure S3 in the supplement, there are indeed only a few catchments with positive correlations (16 to be precise; located in the US, Great Britain, and Germany). But since there are some in most of the studied countries, we decided to keep it.

Also in the generation procedure, I note that all the catchments are considered conservative. However, in many datasets (made of mostly small catchments) catchments are significantly contributing to regional aquifers, they “leak”. I am not sure it’s worth to include this aspect in your theoretical experiment, but it could be worth to discuss potential specificities of “leaking” catchments in the discussion part (the fact is that the leaked quantity itself can be sensitive to Precipitation).

This is a good point. It is true that this could also be tested in our theoretical experiment and it would certainly be quite interesting to do so. One way to do so would be the inclusion of a systematic bias in addition to random error. For instance, we could reduce streamflow each year by 10% to mimic a leaky catchment. The effect should be relatively straightforward, though, at least if the reduction is 10% each year: losing catchments will show lower sensitivities (but the same elasticities) because the absolute streamflow anomalies show a smaller spread. This is similar to precipitation undercatch, where the opposite should happen, because precipitation variability will be underestimated.

So, since this happens in real catchments, it certainly also explains some of the variability compared to the Turc-Mezentsev model. From a practical point of view, the difficulty then lies in identifying places where this is actually the case, which is probably too much for the current manuscript.

We will therefore not add any additional analyses, but discuss this in more detail in our revised manuscript.

1170 Temporal trend: it is not very clear which type of trends you apply (I understood later that you just use the observed trends: it would be good to add a sentence here on this).

Thanks for pointing that out. We will expand the description to make it clearer.

Fig3: I understand now that the nonparametric method of Sankarasubramanian et al (2001) gives wrong (i.e. positive) sensitivities of streamflow to  $E_p$ . Did anybody in the literature ever mentioned that?

Good question. The method is mostly used for sensitivities to precipitation, since studies investigating sensitivities to potential evaporation are usually aware of the strong confounding effect of precipitation, thus using multiple regression or Budyko-type approaches. So, to our knowledge, it has not yet been reported but also not often been used. We are happy to emphasize that.

1240, Fig 4: it would be interesting to note that one of the methods respects (almost) the physical limits, while the other does not. But I still do not understand why you introduced the multiple Regression #1 with intercept set to 0. It was obviously a bad choice... the model uses the degree of freedom of  $s_p$  (which is often not even statistically significant) to compensate for the lack of intercept in the regression: you end up fitting  $Q = aP + b$  and not  $Q = aP + bE_p$

We mention that one of the methods mostly respects the physical limits in 1.236-237 of the manuscript, but we will make this clearer.

Regarding Multiple Regression #1: as discussed above, we agree that it is not a perfect choice, but we did want to present it as it yields interesting results. In addition, if we were to use the results for  $s_{Ep}$  from Multiple Regression #2 in the rest of the manuscript, we would end up with poorly defined sensitivities to potential evaporation. This would make the follow-up analyses much less clear, as shown below, where we compare the trends in  $s_{Ep}$  for Australia and Germany using both methods.

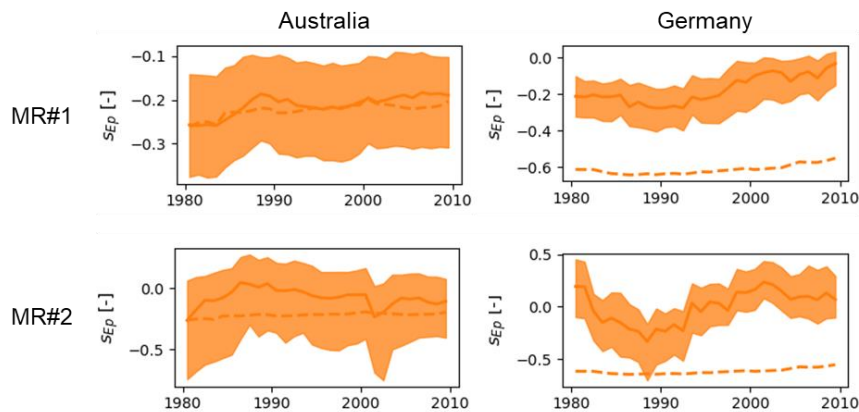

Given that MR#2 is the most commonly used method, we will add all results using MR#2 to the supplement, so that interested readers can also have a look at them.

Fig6: very interesting graph

1265: when you look at the change of sensitivities with aridity defined as a variable it is like using a second-order assumption of “space-for-time trading”. You should mention it.

We will add this to our revised manuscript.

1274: this is a very interesting and very original result of your paper. I would be particularly interested to understand whether it is linked to a change in seasonality (not accounted for in the regressions), to the incapacity of the  $E_P$  model to represent the true evolution of the evaporative demand of the atmosphere, or to some other factor... A suggestion (for another paper) would be to test a monthly or daily rainfall-runoff model. If it is able to represent the change of precipitation sensitivity, then the problem is due to the seasonality that the annual anomaly model cannot account for. Otherwise, it means some other hydrological process is unaccounted for (or the  $E_P$  model is inappropriate).

This is an interesting question. When plotting the evolution of seasonality over time (using the seasonality index based on Woods, 2009), we find little overall changes in Australia (but a very wide range) and a slight increase in Germany, suggesting that rainfall has become slightly more summer dominant. Note that this index, which is based on how the seasonality of  $P$  aligns with the seasonality of  $T$ , is 1 for summer dominated catchments and -1 for winter dominated ones.

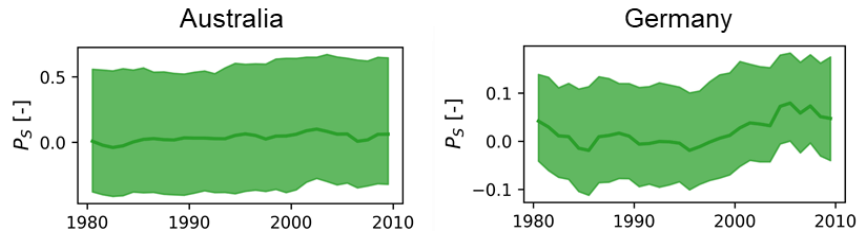

If we assume that summer dominant (i.e., more in phase) rainfall leads to less streamflow, we would expect a greater reduction in  $Q$  than predicted by the Turc-Mezentsev formula. This isn't the case, however, because when we compare observed  $Q$  to predicted  $Q$  we find an almost perfect match (note that in response to R#2 we now use a calibrated  $n$  value for the theoretical results in this plot). The reduction in the sensitivities does match the increase in seasonality, though, so this certainly could be a reason. For now, we think it is best to view this as a hypothesis, which will require more detailed testing, possibly including a model as suggested or an analysis of sub-annual sensitivities (e.g., weekly; Weiler et al., 2025).

We will also discuss limitations of the  $E_p$  model and other data issues as an alternative hypothesis, even though using different data sources does not fundamentally alter any of the patterns found here (see reply to R#2).

In addition, when relating sensitivity anomalies (i.e., differences between Turc-Mezentsev and empirical sensitivities) to catchment characteristics, we find the highest correlation with BFI and only a very weak correlation with seasonality. So, another hypothesis would be that slowly responding systems show lower sensitivities and lower trends because they are less directly driven by annual climate fluctuations. Perhaps this influence or other influences have become even stronger in recent years, explaining the stronger than expected reduction, though this remains speculative. This could be tested in future studies by also checking how storage sensitivities have changed, for instance using a lag-1 autocorrelation term (cf. supplementary Figure S6).

Long story short: there appears to be no simple explanation for the observed patterns and they likely originate from a mix of reasons. We will thus expand the discussion and add some additional plots to the supplement, but leave a detailed investigation for future work.

Table 4: I am not sure to understand the sign of the relative values (and the necessity for them, if it is complicated to understand). Is this table really useful? Fig 7 and 8 are already extremely clear.

We wanted to give some actual numbers and not just figures, but since R#2 also commented on this table, we will remove it. With regard to the sign: the sensitivities decrease, hence the negative sign. Since all our values decrease, we could also remove it, but it is technically more accurate.

Figure 7 and Figure 8 are extremely clear and interesting. Without requesting too much additional analysis (because it would turn your paper into a book...), I was wondering whether the Australian dataset would allow for producing 2 subsets one with  $P$  and  $E_p$  out of phase (the Mediterranean part of Australia), and another with  $P$  and  $E_p$  in phase: I believe this could help to interpret the trend observed in Germany. Another solution would be to compute an index characterizing the  $P$ - $E_p$  phase-shift.

Thank you for the suggestion. To follow up on this, we first calculated a seasonality index for all catchments. From the figure below, we can see a tendency for a weak summer maximum in Germany, whereas Australia can be divided into a summer and a winter dominant part.

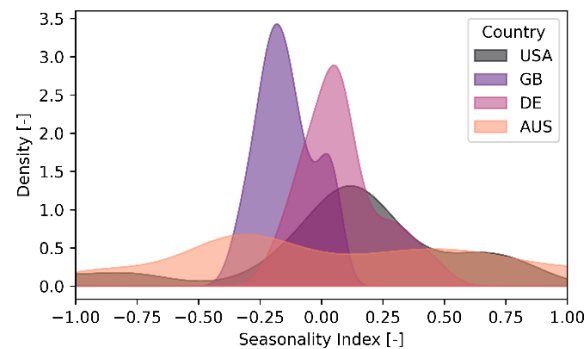

We then had a look at the relationship between the seasonality index and the sensitivities. Overall, the influence of seasonality on both  $Q$  and the sensitivities is neither very strong nor uni-directional in our dataset. We actually find the strongest seasonality-related deviations in some Australian catchments, which, however show higher sensitivities (and higher streamflow) despite being heavily summer dominant. This rather matches Potter et al. (2005) who relate this to infiltration excess runoff following summer storms.

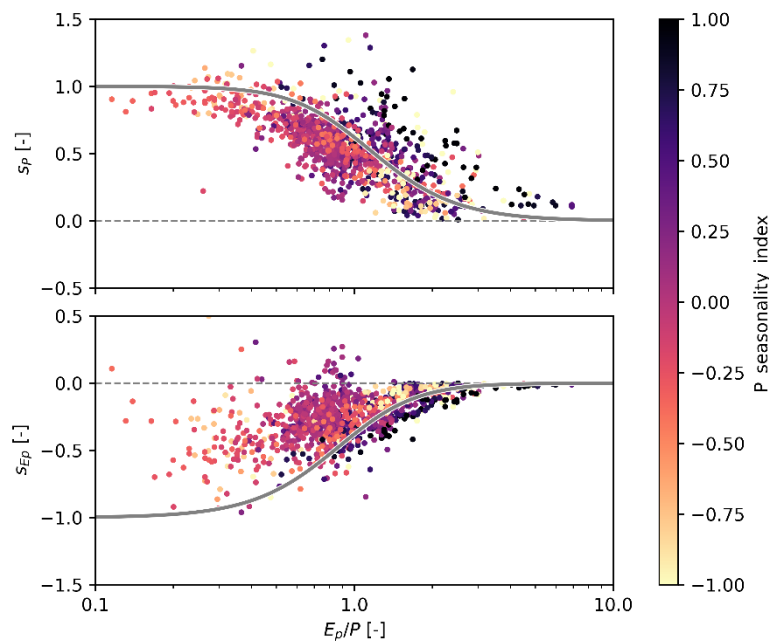

We then also split up the Australian dataset into two subsets with seasonality indices below and above 0, which show quite different patterns. In summer dominant regions, the empirical sensitivities are somewhat larger, matching the figure above. In winter dominant regions, we find the opposite and generally stronger differences between empirical and theoretical trends. So, the previously well-matching pattern for Australia appears to be in part an artefact of averaging across various climates in which the Turc-Mezentsev model both over- and underestimates the sensitivities. Generally, if the theoretical model cannot reproduce average sensitivities well, it also cannot reproduce the trends well, hinting at a common underlying reason (e.g. processes omitted in the model).

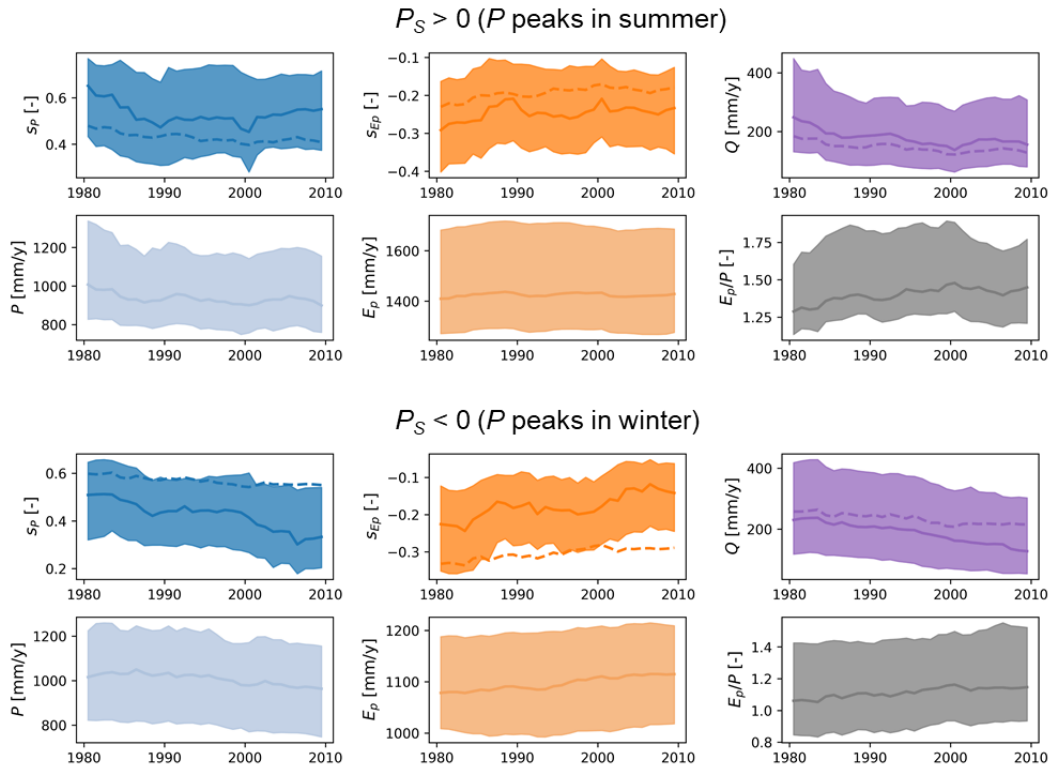

While these patterns are interesting, they are somewhat counter to our expectations. In particular, the catchments in Australia with winter dominant rainfall (i.e., Mediterranean) show a similar behaviour as the German catchments, which have slightly summer dominant rainfall. So perhaps it is not seasonality but some other catchment characteristic that explains these patterns. One characteristic of the German dataset is that the BFIs are largest on average, so we also compared the BFIs for the two Australian subsets, shown below. We can see that the winter dominant subset has a higher BFI on average (it is also somewhat less water-limited; not shown here), thus being closer to the German catchments in terms of streamflow dynamics. While also not a conclusive explanation, it certainly represents an alternative hypothesis.

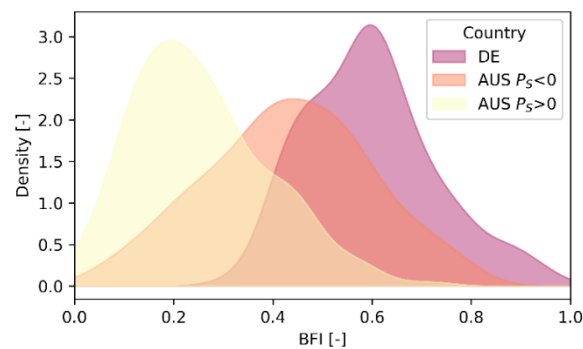

So, overall, we are left with many potentially interesting additional results, but need to restrict the amount of analyses presented to end up with a reasonably concise paper. Our suggestion therefore is to include the two Australian subsets in the trend analysis and add a brief discussion (but not too many additional analyses) on potential reasons for the different trends found in Germany and the two Australian subsets.



1336: you write “More than half of the values based on method #2 are larger than zero”. But I guess that anyway the p-values from a Student t-test would consider these values as non-significantly different from 0. Perhaps mention it?

When using method #2, indeed many of the p-values for  $s_{Ep}$  are smaller than 0.05 (if we chose this as a typical, but arbitrary, threshold). Interestingly, though, the values that are significant are both positive and negative. For method #1, many more values are significant, though of course that might in part be because the second term compensates for a lack of an intercept. We will add the p-values to the supplement and briefly discuss them in our revised manuscript.

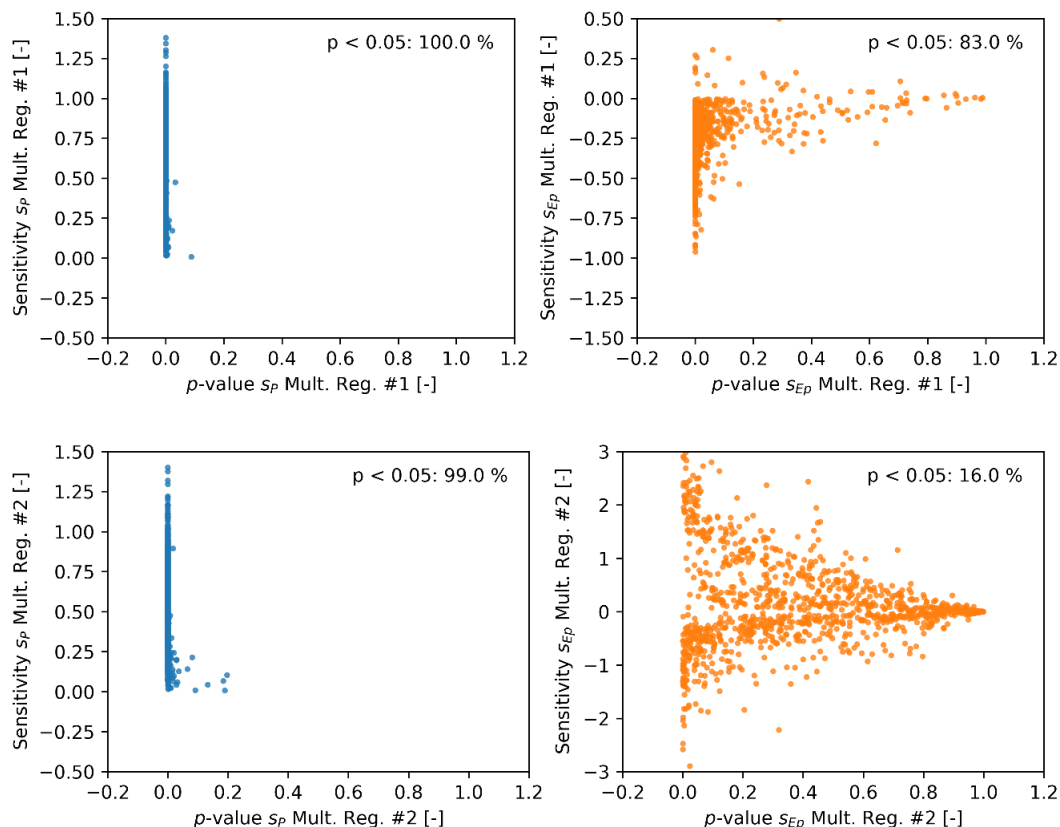

## REFERENCES

Andréassian, V., Guimarães, G.M., de Lavenne, A., and Lerat, J.: Time shift between precipitation and evaporation has more impact on annual streamflow variability than the elasticity of potential evaporation, *Hydrol. Earth Syst. Sci.*, 29, 5477–5491, <https://doi.org/10.5194/hess-29-5477-2025>, 2025.

Efstratiadis, A., Nalbantis, I., and Koutsoyiannis, D., 2015. Hydrological modelling of temporally-varying catchments: facets of change and the value of information. *Hydrological Sciences Journal*, 60 (7–8). doi:10.1080/02626667.2014.982123
